# Supplementary material for: Phi fluctuates with surprisal: An empirical pre-study for the synthesis of the free energy principle and integrated information theory
Source: PubMed Central journal article supplement (PMC10619809; doi:10.1371/journal.pcbi.1011346), 2023-10-20

### A Surprisal

Averaged over trials

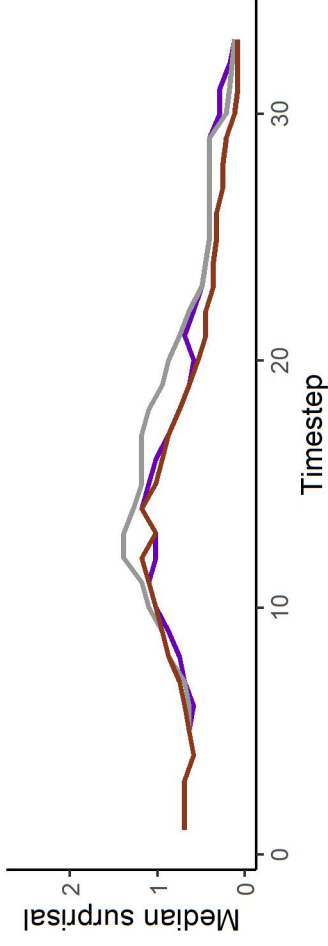

### B Surprisal

Relative to first sight event

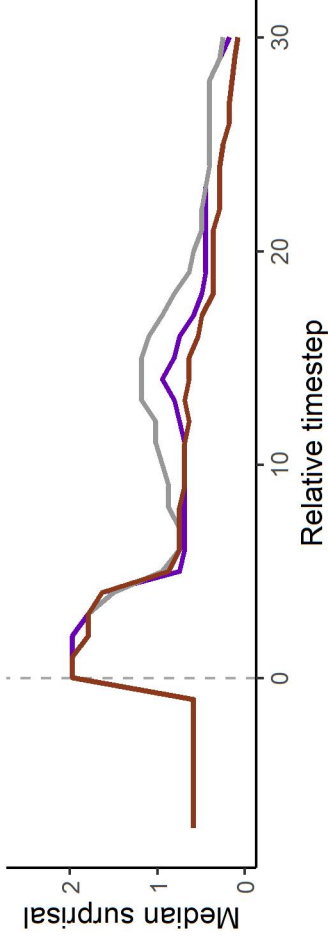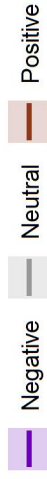

### C Phi

Averaged over trials

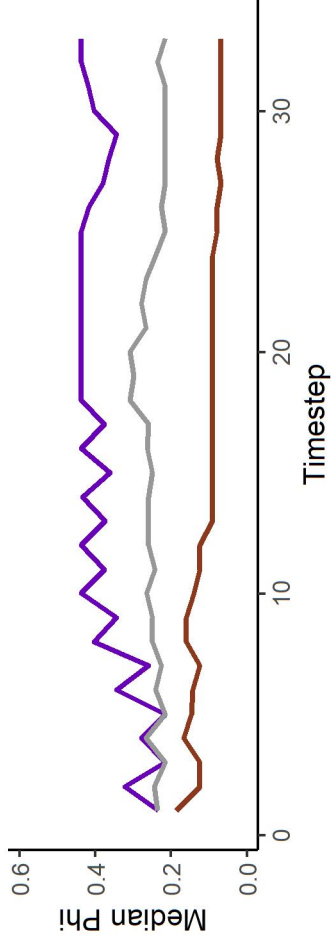

### D Phi

Relative to first sight event

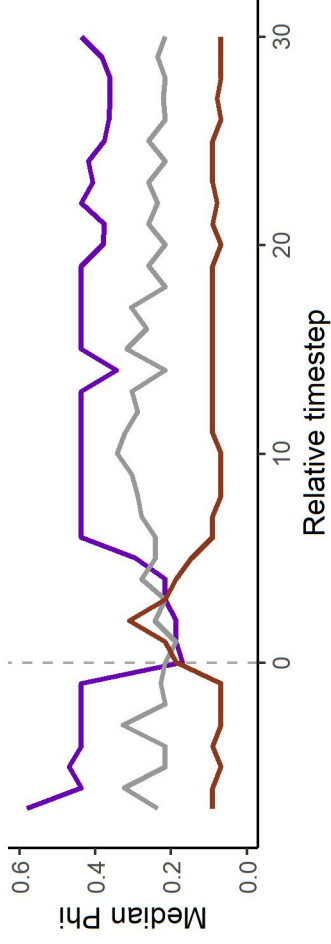

Supplement: pcbi.1011346.s003.pdf [file pcbi.1011346.s003.pdf]
