# Supplementary material for: Phi fluctuates with surprisal: An empirical pre-study for the synthesis of the free energy principle and integrated information theory
Source: PubMed Central journal article supplement (PMC10619809; doi:10.1371/journal.pcbi.1011346), 2023-10-20

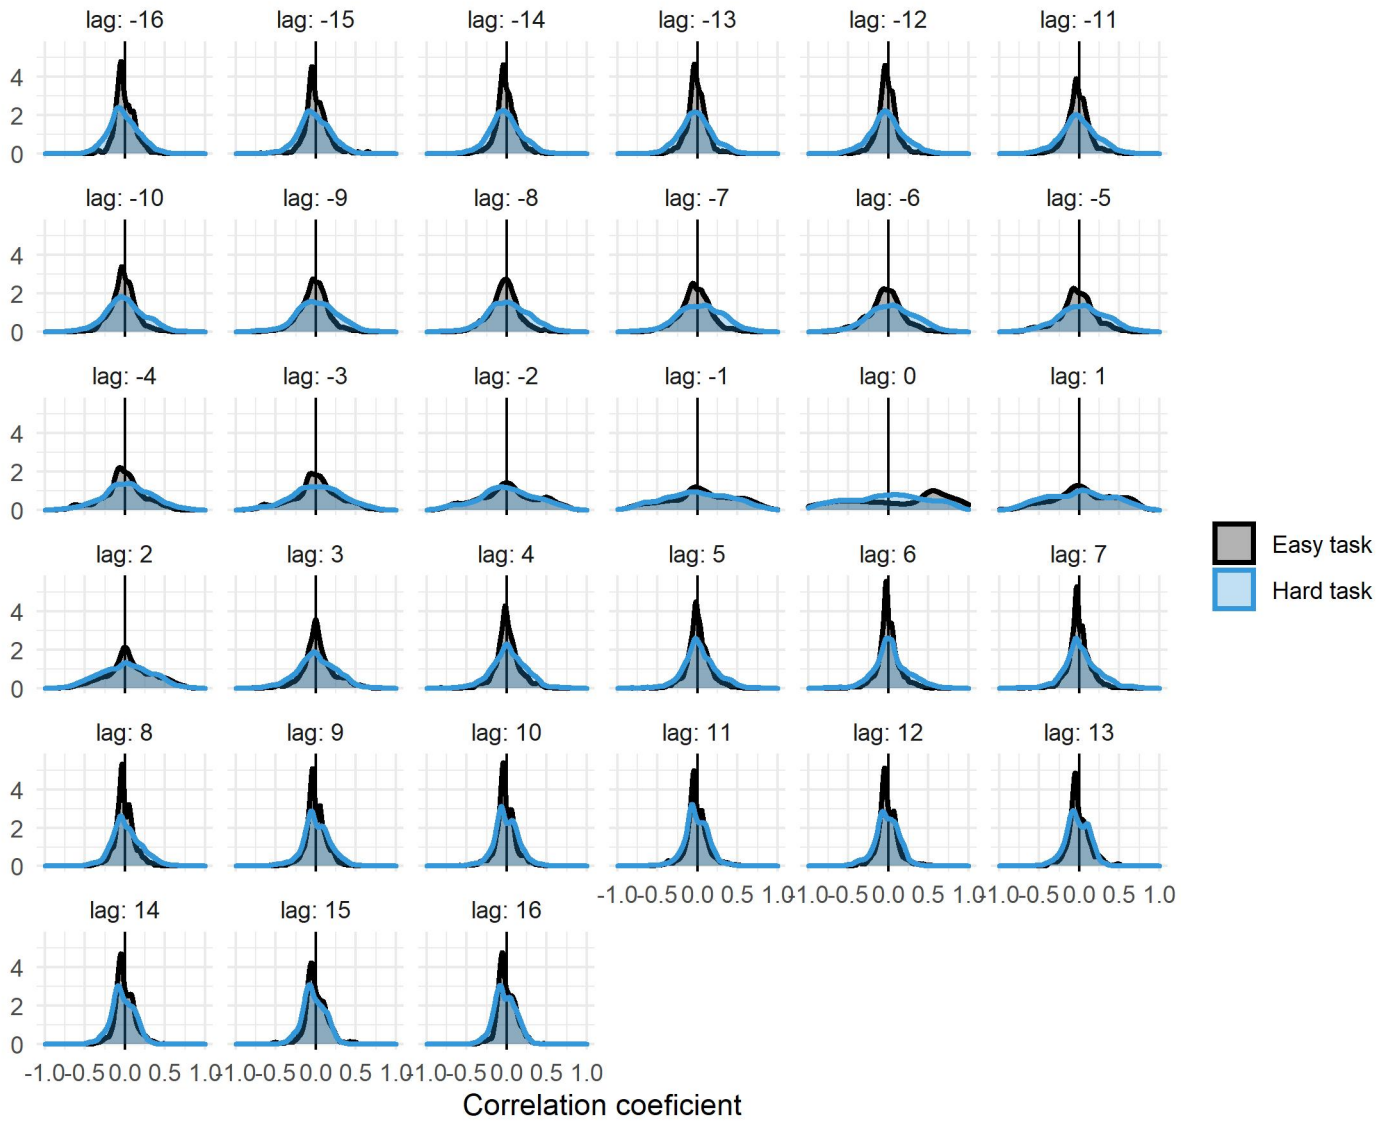

Supplement: pcbi.1011346.s004.pdf [file pcbi.1011346.s004.pdf]
